# Supplementary material for: Preoperative Cholinergic Signatures Drive Segregated Brain Architecture in Postoperative Delirium
Source: Research Square preprint supplement (doi:10.21203/rs.3.rs-7881643/v1), 2025-11-23
Supplement: Supplementary file 1 [file 8ec646656985558d08b7604f.docx]

## **Supplementary Results**

**Table 1: Summary of scanned participant demographics that were analysed in this study.**

|  | **Postoperative Delirium** (*n=*31) | **Non-delirium** (*n=*89) |
| --- | --- | --- |
| Patient Characteristics |  |  |
| Age, YR | 71 (69 – 75) | 71 (68 - 75) |
| Sex, no. | 15 Female | 37 Female |
| Education, no. (%) |  |  |
| <12yr | 2 | 2 |
| 12 yr | 8 | 16 |
| >12yr | 20 | 68 |
| TMT-A | 34 (30.25 – 40.75) | 34 (28 - 43) |
| TMT-B | 81 (65.50 – 99.50) | 68 (54 - 100) |
| MoCA | 24 (22 - 26) | 23 (22 - 26) |
| DSST | 46 (36.50 - 52) | 46 (37 - 54) |
| ASA | 3 (2.50 - 3) | 3 (2 - 3) |
| IL-8 | 9.73 (2.01 – 22.88) *  (n=24) | 2.18 (-0.32 – 6.08) *  (n=62) |
| IL-10 | 11.55 (6.28 – 55.36) *  (n=24) | 1.60 (-0.29 – 7.56) *  (n=62) |
| Surgical Operative Duration (mins) | 331 (218 - 488) * | 208 (170 - 335) * |
| Surgical Category | V=11; G =3; O = 7; U = 2; C = 8 | V = 21; T = 3; G =11; O = 37; S = 2;  U =4; C = 13 |
| NSQIP-SC | 22.25 (9.80 – 32.93)* | 11.10 (7.20 – 15.80) * |
| NSQIP-D | 3.30 (0.63 – 5.48) * | 0.70 (0.20 – 2.60) * |
| Overall Peak DRS | *17 (13-21)* * | 10 (8 -12) * |

Clinically relevant data listed. Median and (Interquartile Range). Years (YR). Montreal Cognitive Assessment (MoCA). Trail Making Test A/B (TMT-A and TMT-B). Digit Symbol Substitution Test (DSST). American Society of Anaesthesiologists Physical Status Classification (ASA). National Quality Improvement Program for surgical risk of serious complications (NSQIP-SC). American College of Surgeons’ National Quality Improvement Program for surgical risk of death (NSQIP-D). Interleukin-8 (IL-8) and Interleukin-10 (IL-10), calculated as postoperative day 1 minus baseline recording. Surgical Categories as follows; V= Vascular, T= Thoracic, G = General, O = Orthopedic, S = Spinal, U= Urological/Gynaecological, C = Cardiac.

**P<0.05 significant difference between groups was determined by Mann Whitney U-Test (as one set of data was not normally distributed),IL-8 difference p=0.0023, IL-10 difference p=2.79e-6, surgical operative duration p=0.0037, overall peak DRS P=4.73e-12, NSQIP-D P=0.0047, NSQIP-SC P=0.0052.*

**Table 2: Patient Clinical data for entire recruitment for study divided into postoperative delirium or non-delirious for both MRI scan and not scanned participants.**

|  | **Non-scanned** | | **All Scanned** | |
| --- | --- | --- | --- | --- |
|  | Delirious  (*n*=40) | Non-delirious  (*n*=108) | Delirious  (*n*=33) | Non-delirious  (*n*=102) |
| Age, YR | 71 (67.75 – 74.25) | 71 (68 - 75) | 71 (69 - 75) | 71 (68 – 75) |
| Sex | 15 Female | 35 Female | 16 Female | 41 Female |
| Education |  | | | |
| <12yr | 0 | 3 | 2 | 2 |
| 12 yr | 10 | 29 | 8 | 18 |
| >12yr | 28 | 76 | 23 | 82 |
| TMT-A | 35 (29.5 – 45.5) | 32 (27 – 40.75) | 34.50 (30.75 – 41.50) | 34 (28 - 43) |
| TMT-B | 81.5 (± 57.75 – 97.75) | 66 (52.50 – 89.50) | 81 (66 - 102) | 66 (53.25 - 94) |
| MoCA | 23 (22 - 24) | 23 (22 - 25) | 24 (22 - 26) | 23 (21 - 26) |
| DSST | 40 (34 - 52) * | 48.5 (40.75 - 55) * | 46 (37 - 52) | 47 (37.25 – 54.75) |
| ASA | 3 (3 – 3.25) | 3 (3 -3) | 3 (2 - 3) | 3 (2 - 3) |
| IL-8 | 15.69 (5.43 – 53.19) *  (n= 22) | 2.86 (-0.105 – 10.93) *  (n=28) | 7.98 (1.30 – 21.15) *  (n = 24) | 2.40 (-0.2 – 6.24) *  (n= 65) |
| IL-10 | 28.23 (6.27- 74.60) *  (n= 22) | 3.05 (0.58 – 13.64) *  (n=28) | 10.74 (6.02 – 40.80) *  (n= 24) | 1.56 (-0.31 – 7.37) *  (n= 65) |
| Surgical Operative Duration (mins) | 469 (382.25 – 626.75) ** | 300 (226.50 - 394) ** | 331 (221 - 529) * | 218 (173 - 341) * |
| Surgical Categories | V = 13; T =1; G= 5;  O = 4; U = 2; C = 15 | V= 24; T = 11;  G = 20; O = 6; S = 4; U = 23; C=23 | V = 11; T =0; G=3; O =8; U = 2; C = 8 | V = 23; T = 4; G = 14; O = 39; S = 2; U = 4; C = 18 |
| NSQIP-SC | 24.2 (13.10 – 33.40) * | 16.3 (11.25 – 25.15) * | 22.25 (11.55 – 31.38) * | 11.2 (7.30 – 15.80) * |
| NSQIP-D | 3.6 (1.80 – 6.10) * | 1.35 (0.68 – 3.43) * | 2.7 (0.675 – 5.43) * | 0.7 (0.20 – 2.60) * |
| Overall Peak DRS | 16.5 (15 – 21.50) * | 10 (9 - 12) * | 19 (13 - 22) * | 10 (8 - 12) * |

Clinically relevant data listed. Standard Deviation (SD). Years (YR). Montreal Cognitive Assessment (MoCA). Trail Making Test A/B (TMT-A and TMT-B). Digit Symbol Substitution Test (DSST). American Society of Anaesthesiologists Physical Status Classification (ASA). Interleukin-8 (IL-8) and Interleukin-10 (IL-10), calculated as postoperative day 1 minus baseline recording. National Quality Improvement Program for surgical risk of serious complications (NSQIP-SC). American College of Surgeons’ National Quality Improvement Program for surgical risk of death (NSQIP-D). Note inflammatory biomarkers were calculated as the difference in postoperative and baseline within a subset of participants. Surgical Categories as follows; V= Vascular, T= Thoracic, G = General, O = Orthopedic, S = Spinal, U= Urological/Gynaecological, C = Cardiac.

**p<0.05 significance determined by Mann Whitney U-Test (as one set of data was not normally distributed), for between not scanned postoperative delirious and non-delirious in DSST scores p=0.01784, IL-8 difference p=0.0008, IL-10 difference p=0.0006, overall peak DRS p= 2.2e-16 , NSQIP-D p=0.001, NSQIP-SC p=0.013. For between scanned postoperative delirious and non-delirious IL-8 difference p=0.022, IL-10 difference p=6.29e-5, surgical operative duration p=0.0002, overall peak DRS p= 2.76e-36 ,NSQIP-D p=0.003, NSQIP-SC p=0.0002.*

*** p<0.05 significance determined by Two Sample T-Test (data normally distributed), for between not scanned postoperative delirious and non-delirious surgical operative duration p=2.42e-7.*

**Supplementary Figures**

**
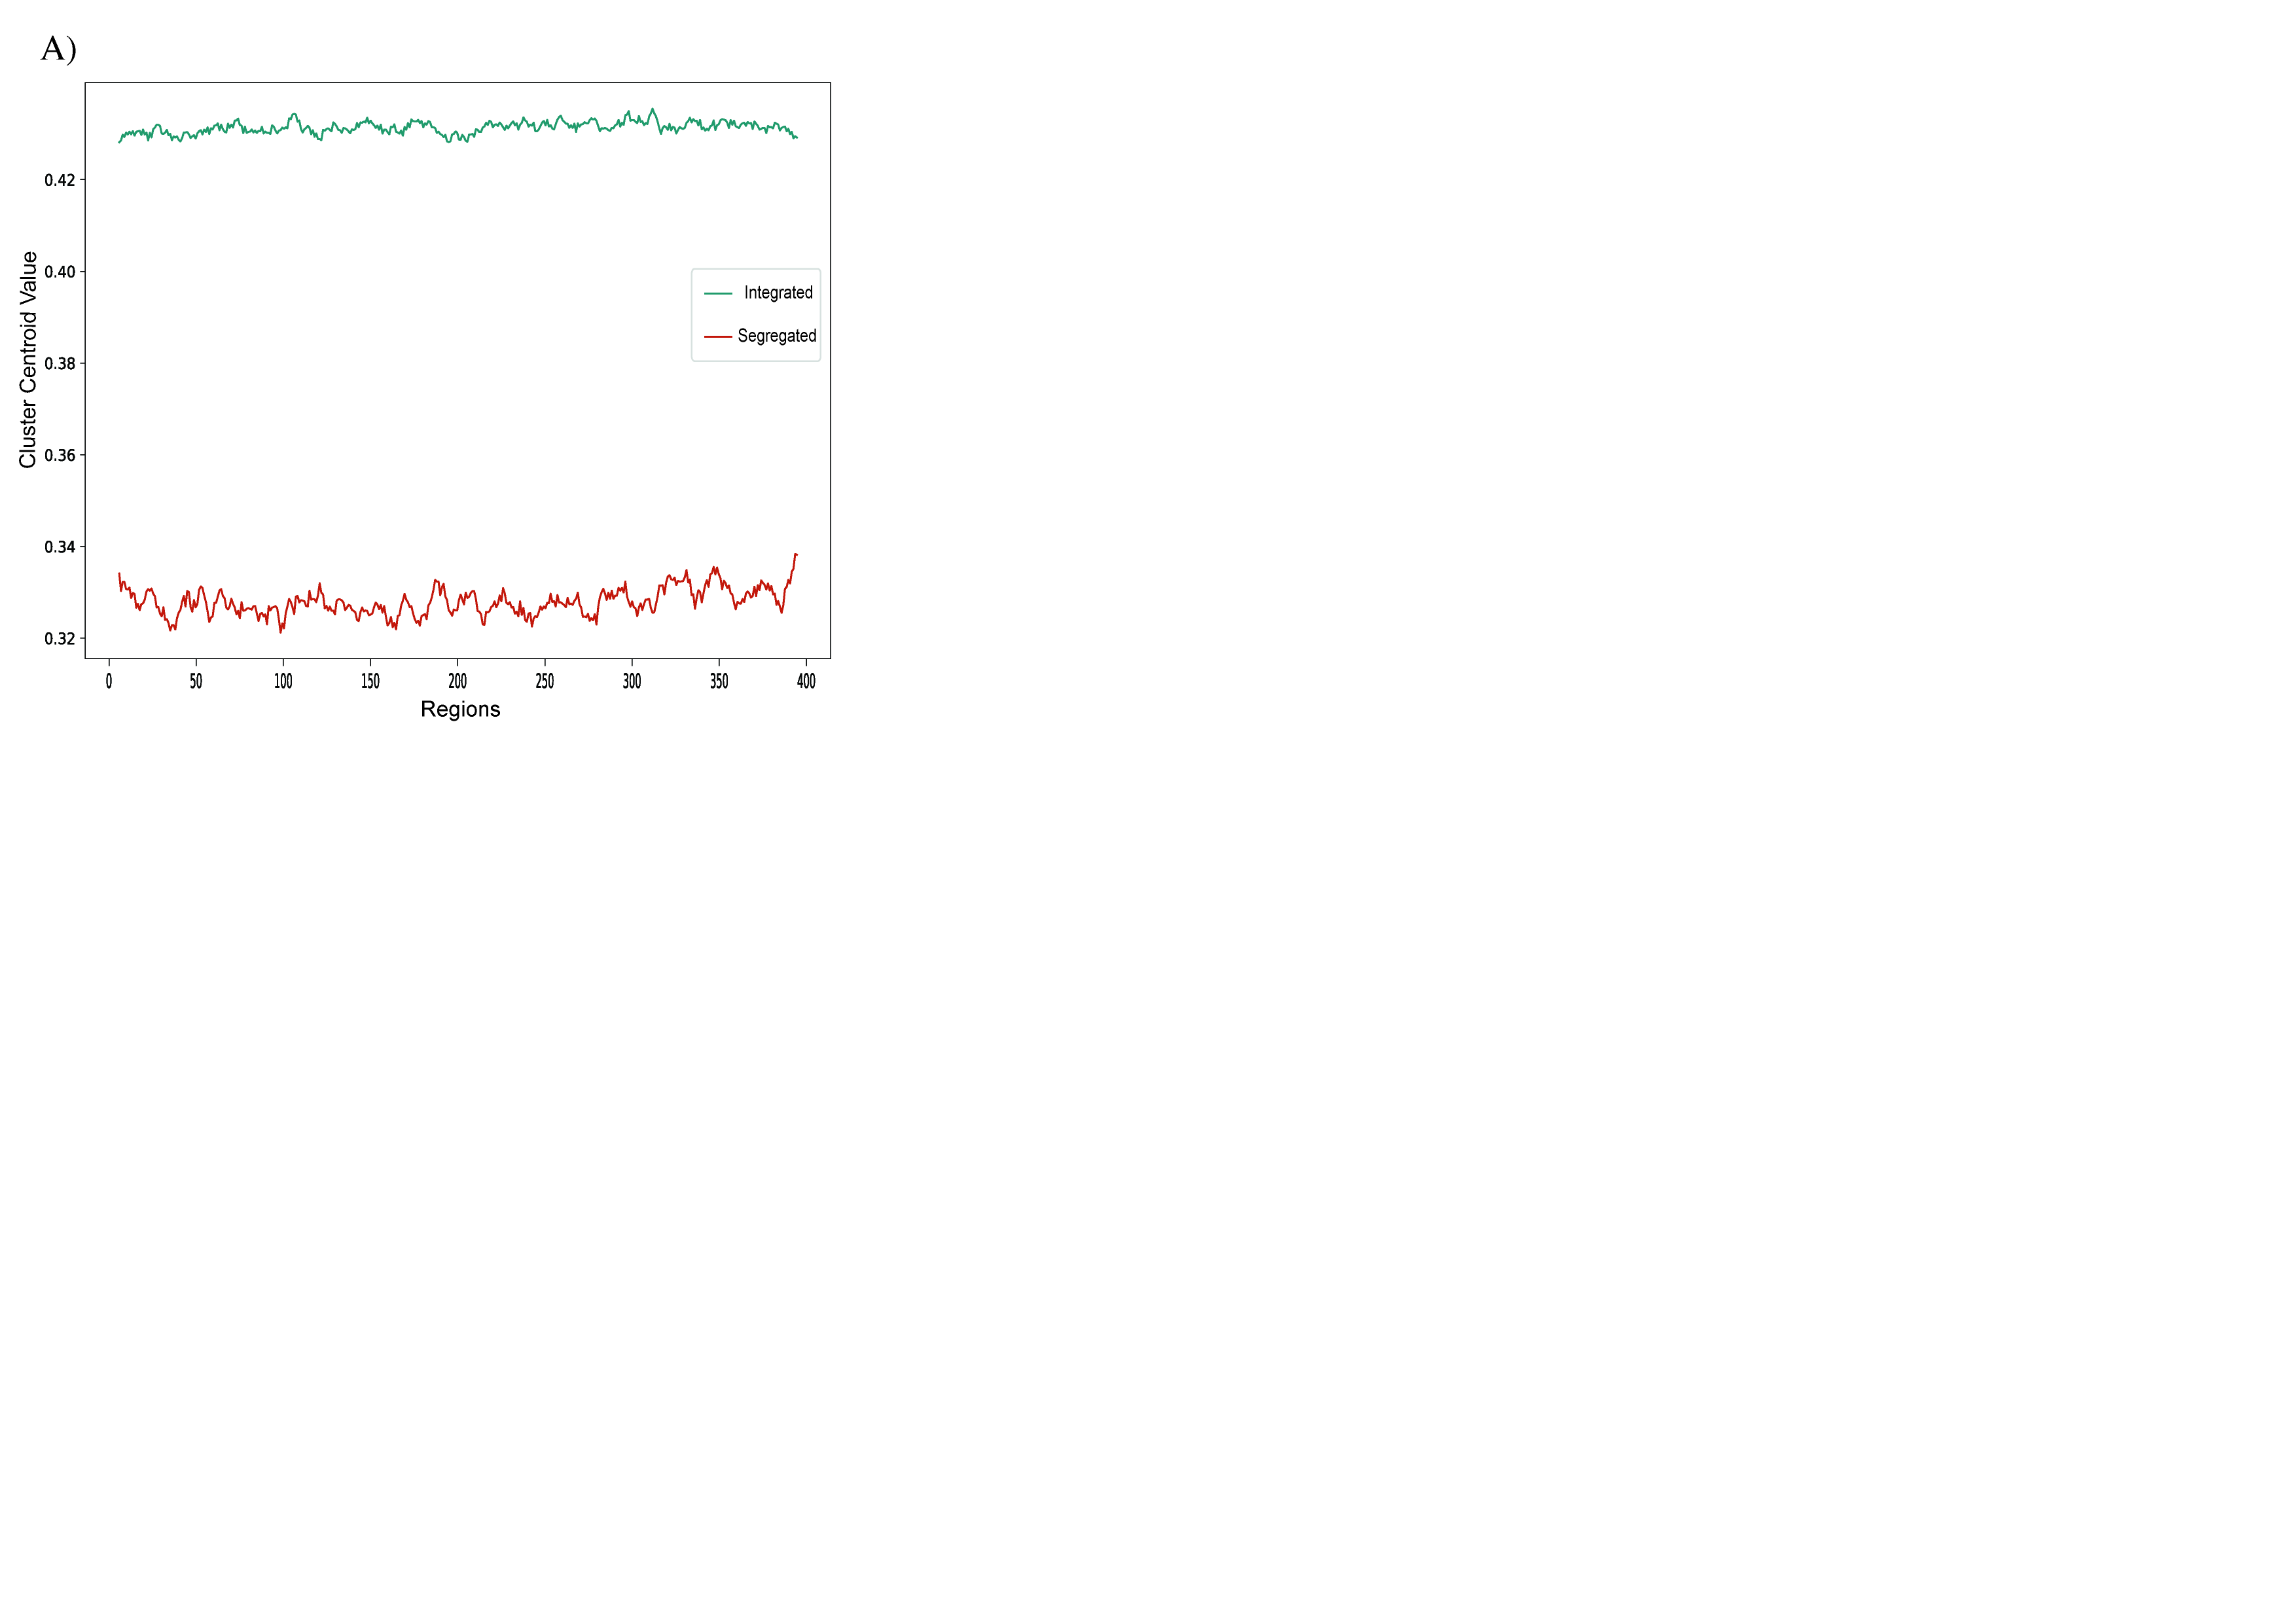
**

***Supplementary Figure S1:*** ***Clustering centroid values that define the distinct clusters (k=2) across all regions of interest.***


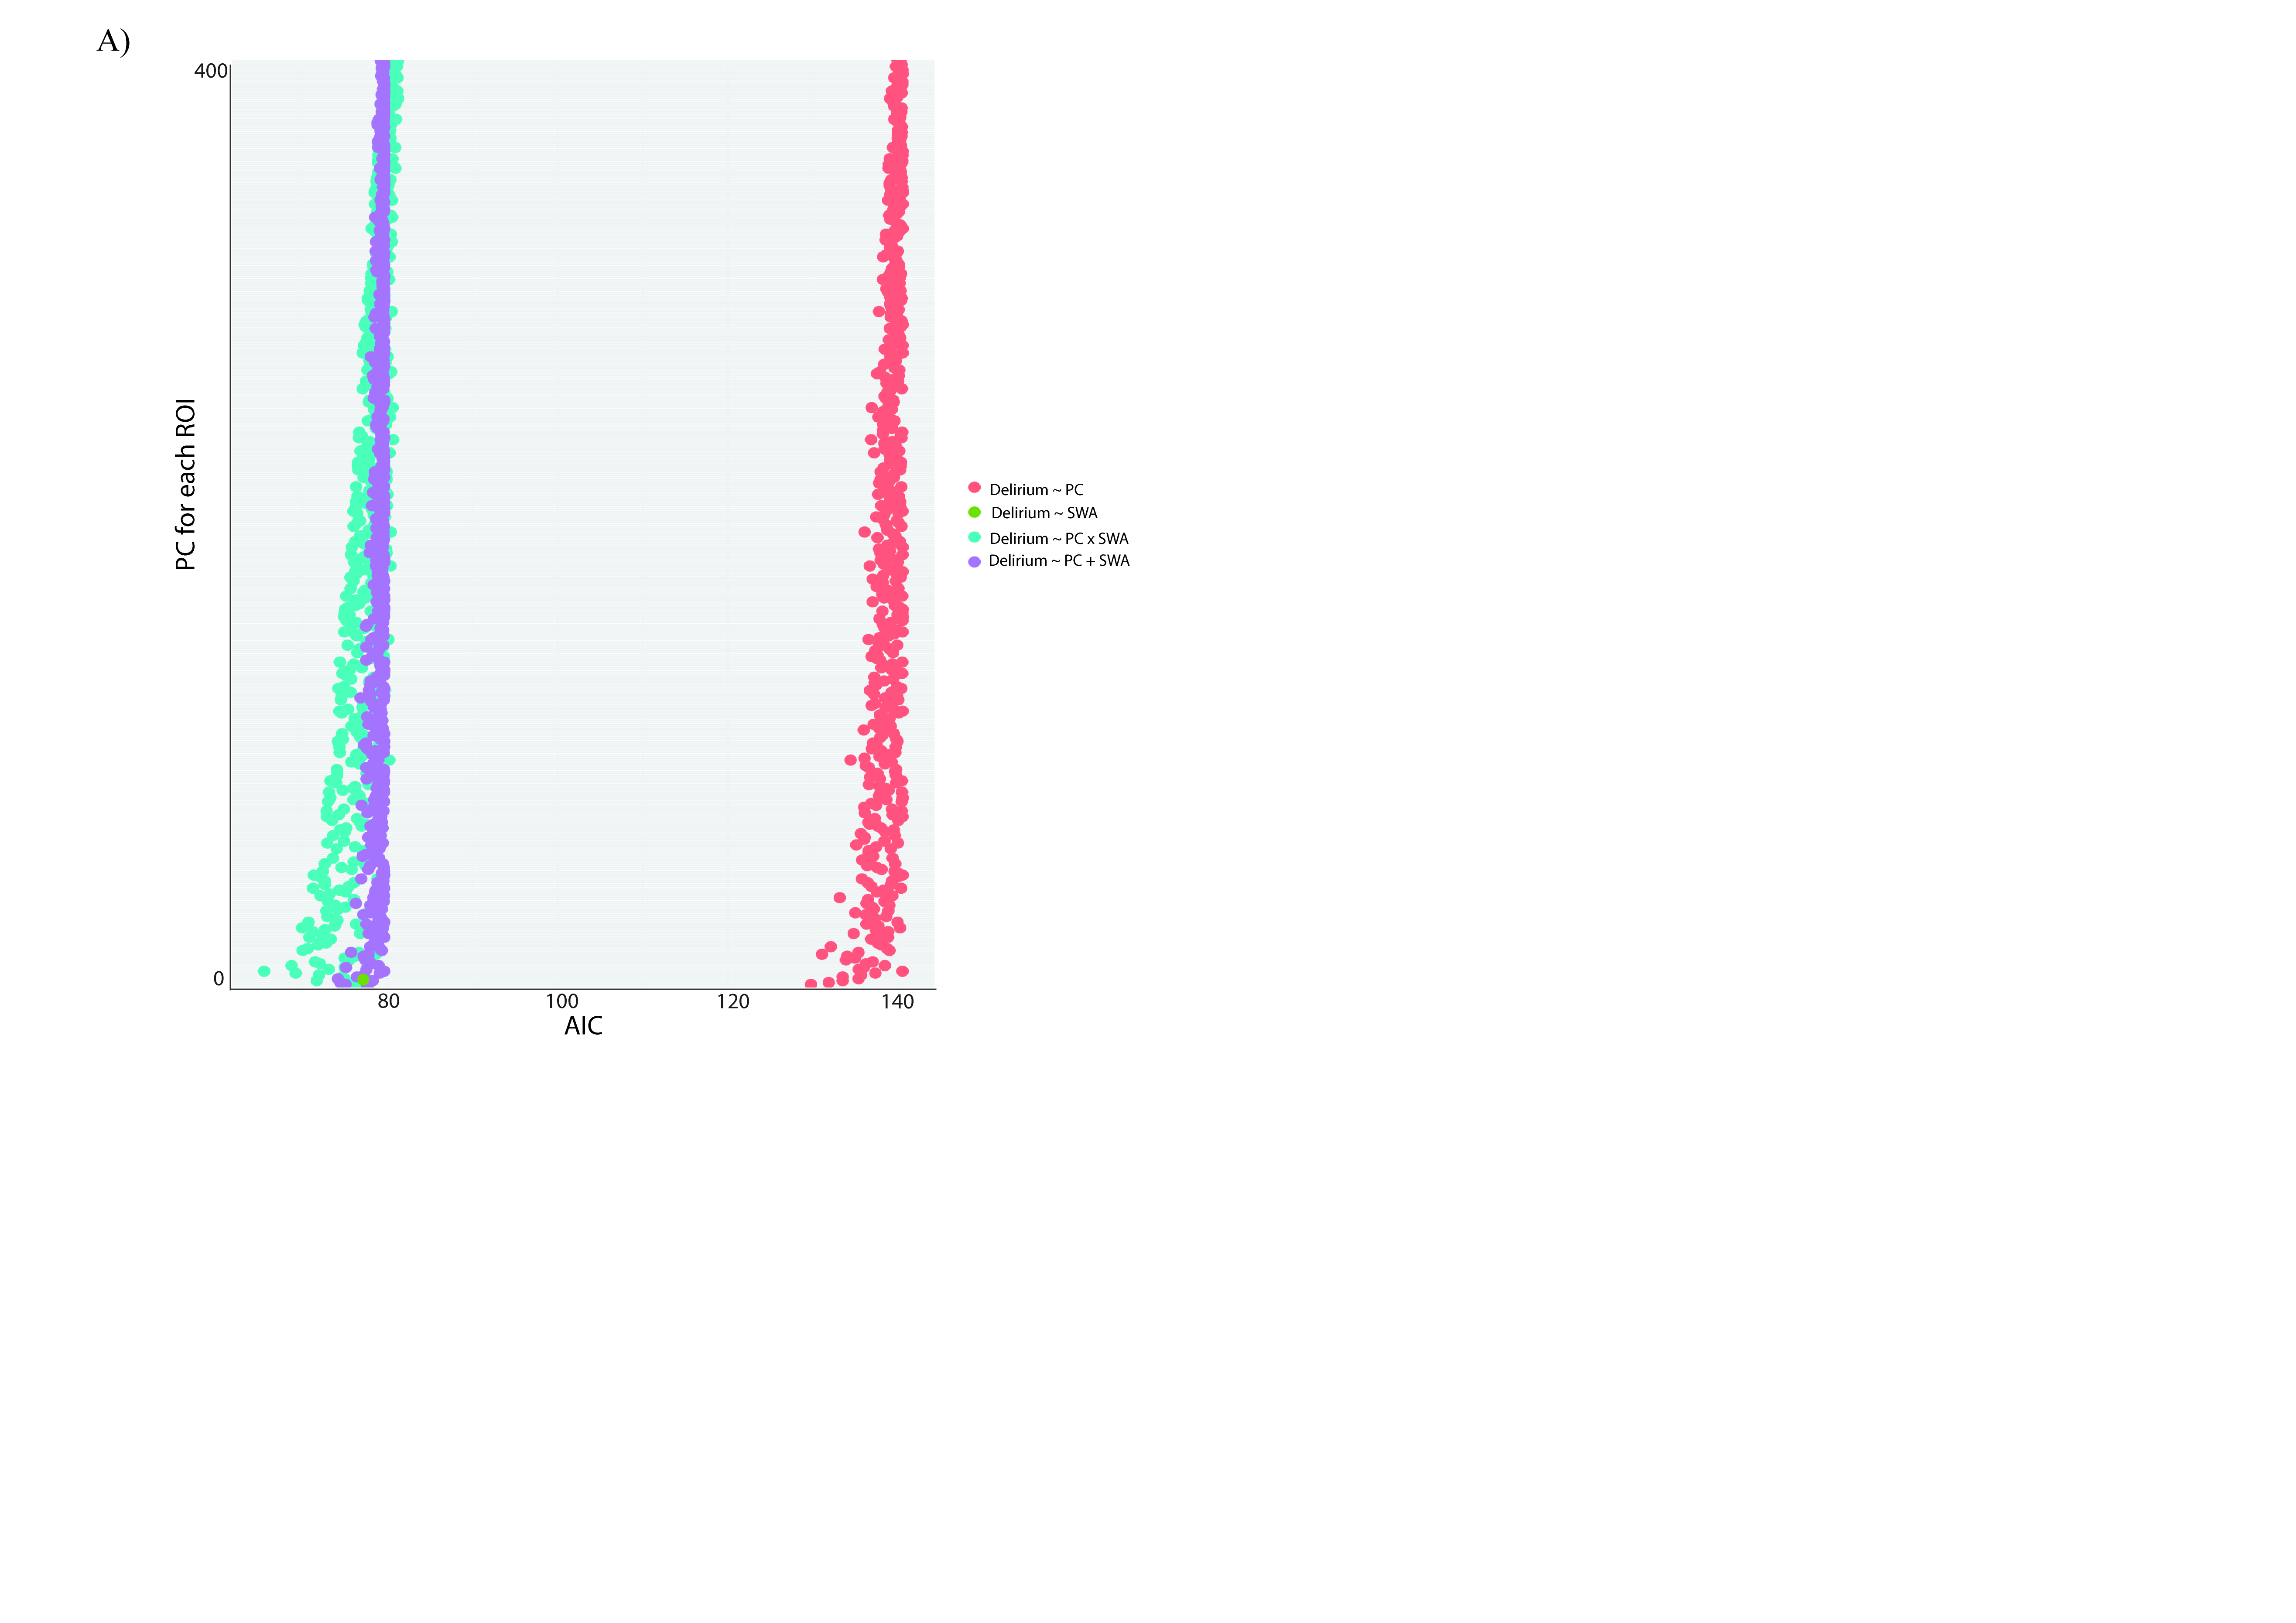


***Supplementary Figure S2: Logistic regression analysis for the participation coefficient and slow-wave EEG activity in predicting postoperative delirium outcome.*** *A) Akaike Information Criterion (AIC) comparison across different iterations of the logistic regression models evaluated in the methods for each regional participation coefficient (PC) across the 400 cortical ROIs.*


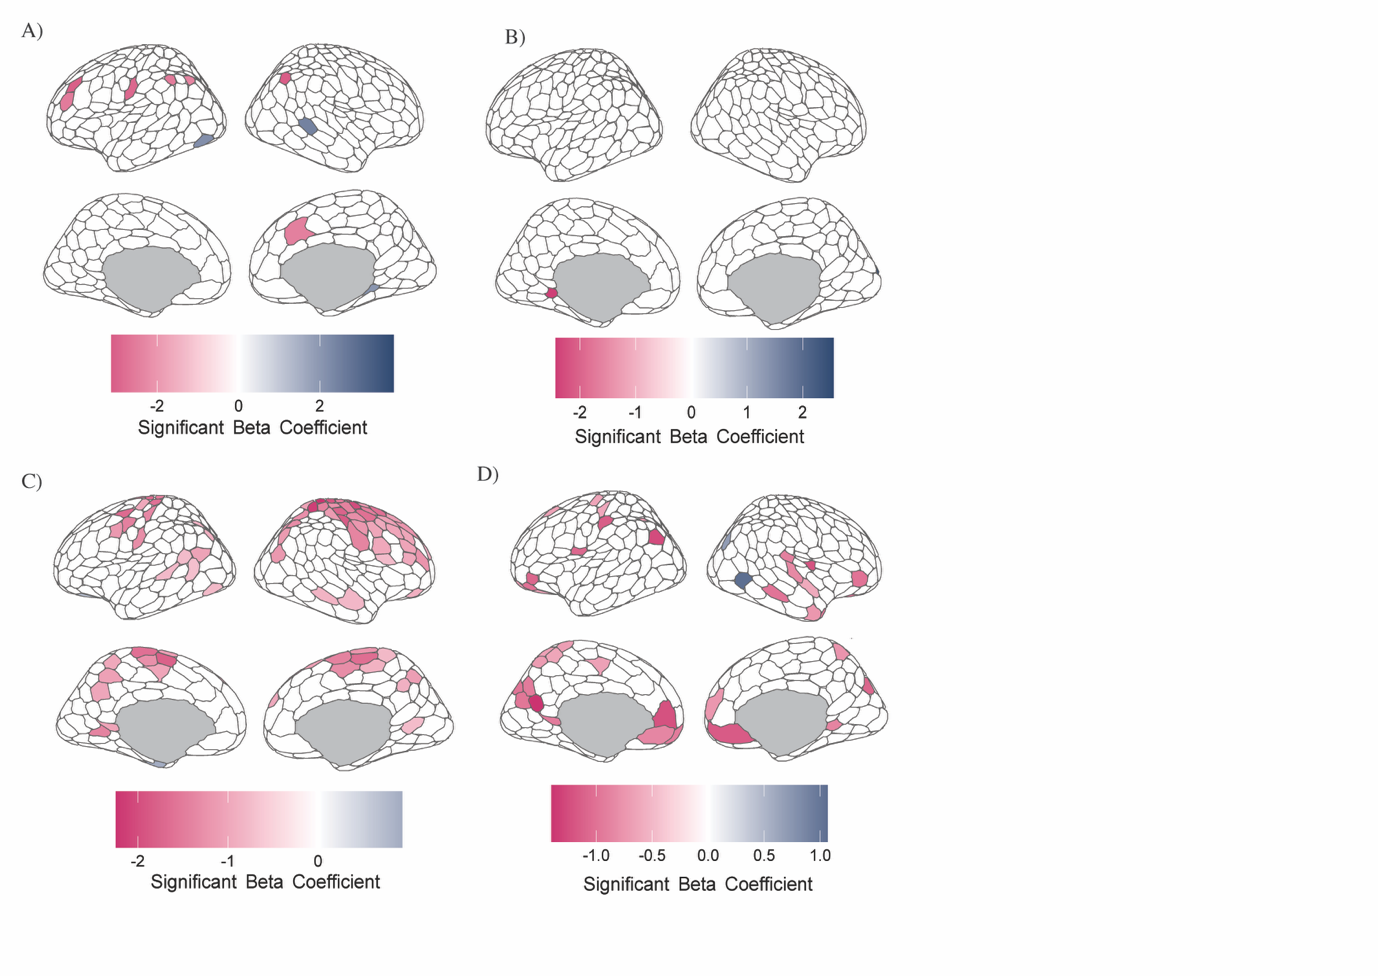


***Supplementary Figure S3:*** ***Simple logistic regression analysis for the average functional connectivity in predicting postoperative delirium outcome.*** *A) Logistic regression (binomial) for the average functional connectivity from the LC to the cortex in predicting postoperative delirium (p<0.05, not FDR significant). B) Logistic regression (binomial) for the average functional connectivity from the nbM to the cortex in predicting postoperative delirium (p<0.05, not FDR significant). C) Logistic regression (binomial) for the average functional connectivity from the LC to cortex with an interaction with difference in slow-wave activity (Oz-delta power) in predicting delirium (p<0.05, not FDR significant). D) Logistic regression (binomial) for the average functional connectivity from the nbM to cortex with an interaction with difference in slow-wave activity (Oz-delta power) in predicting delirium (p<0.05, not FDR significant).*

*
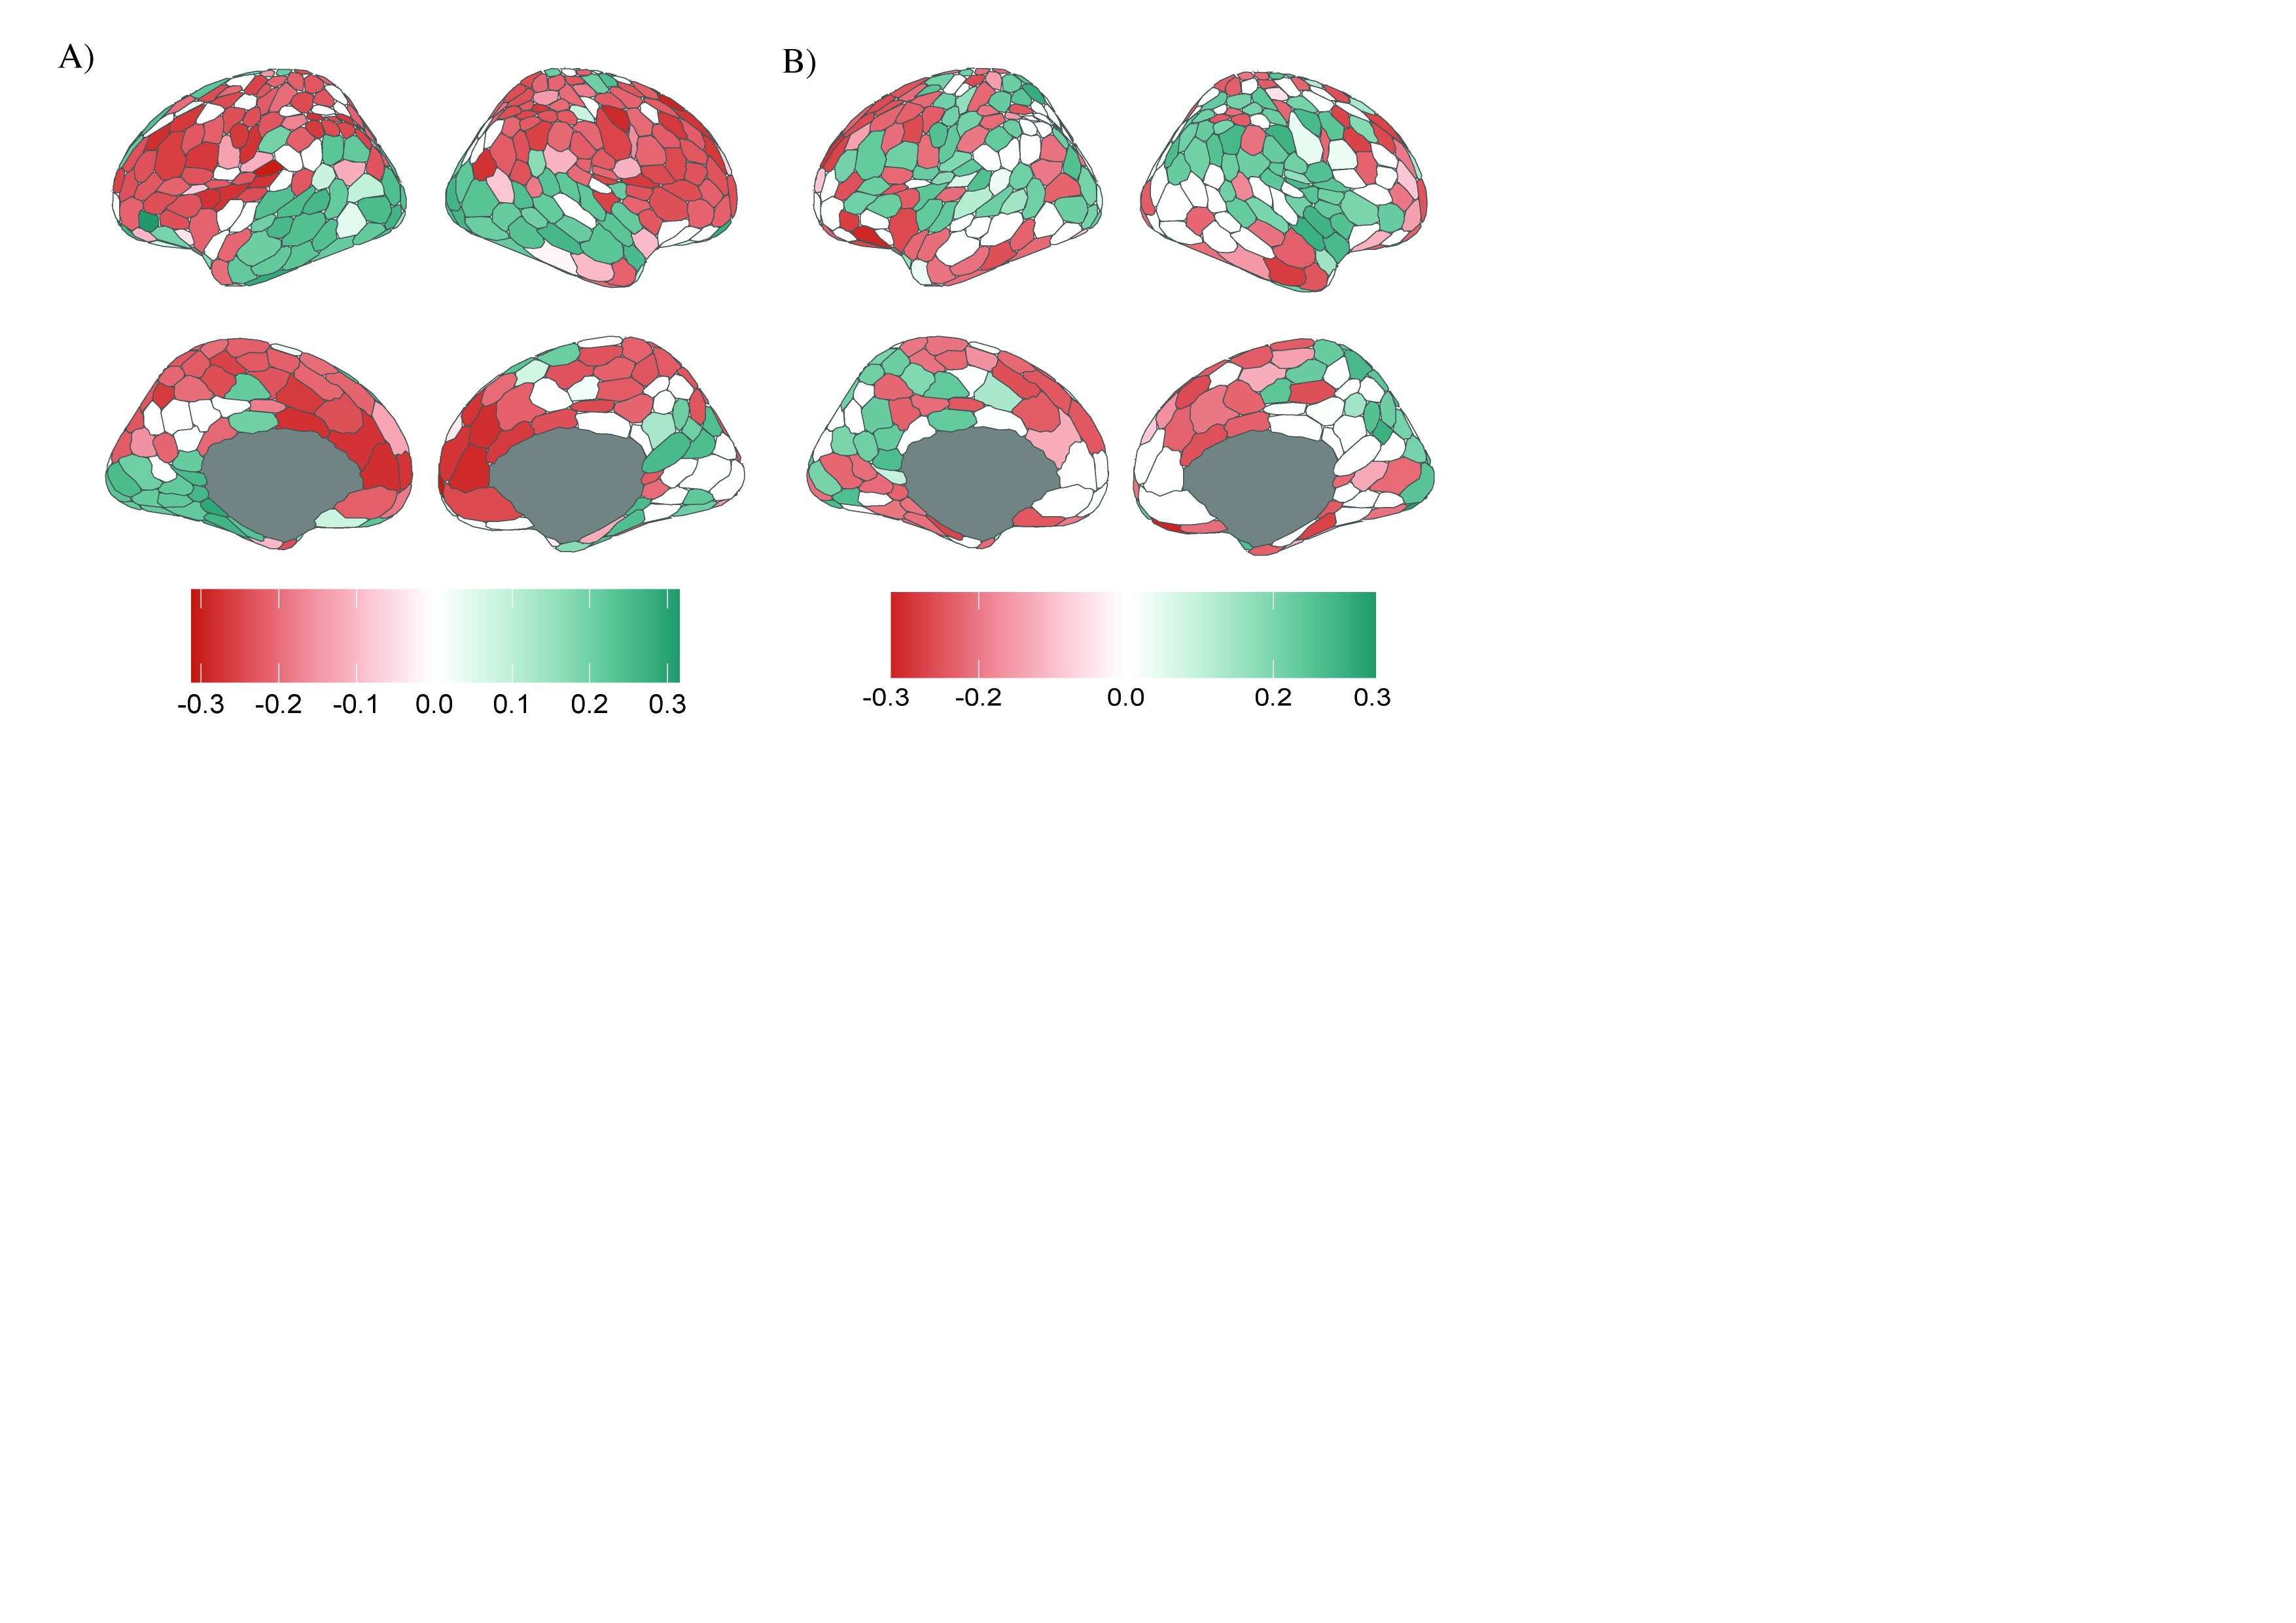
*

***Supplementary Figure S4: Significant differences in ascending arousal dynamic functional connectivity between delirium and non-delirious populations.*** *A) Significant differences in the average dFC for LC to the cortex (over-time), thresholded to only average significant regions that have connections +/- 0.2 (permuted p<0.05, 1000 iterations). B) Significant differences in the average dFC for nbM to the cortex (over-time), thresholded to only average significant regions that have connections +/- 0.2 (permuted p<0.05, 1000 iterations).*


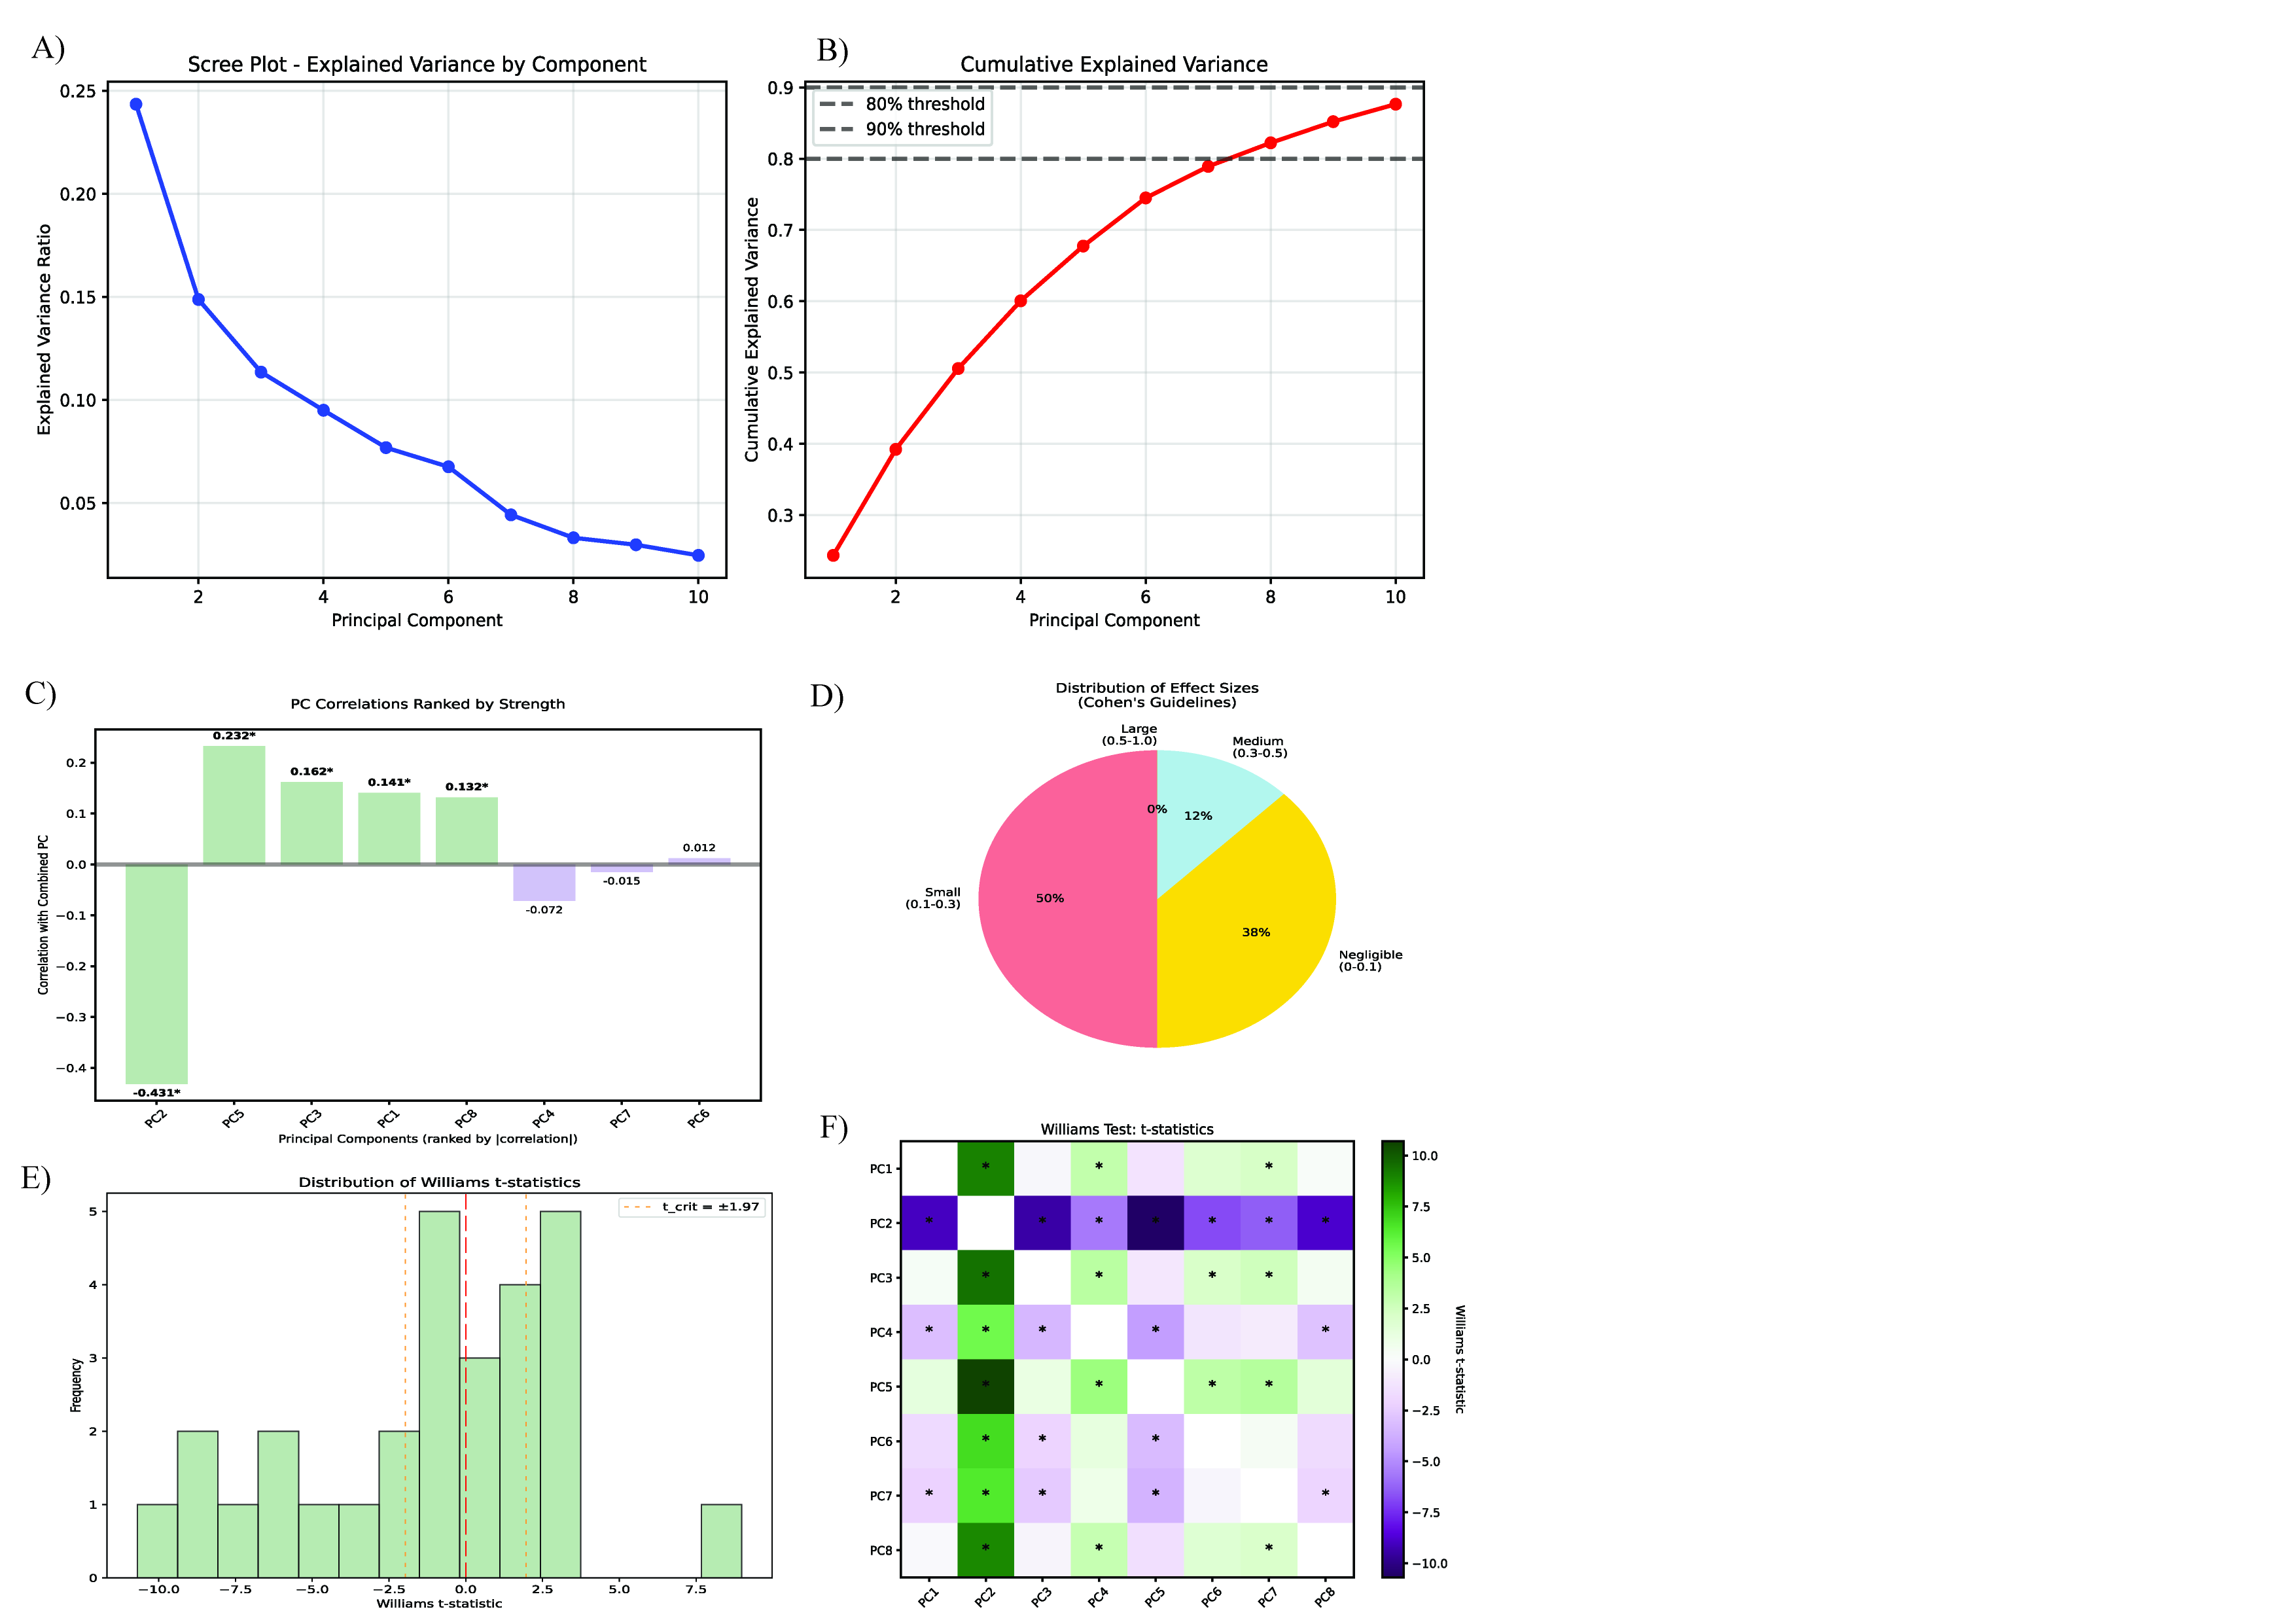


***Supplementary Figure 5: Principal Component of Gene Expression.*** *A) Scree plot of the amount of explained variance for each principal component of the cholinergic gene expression pulled together across the Human Allen Brain Atlas. B) Cumulative explained variance across the principal components, over 80% of variance explained with 8 principal components. C) Rank categorisation of the principal components performance in correlation with average participation coefficient (green passed FDRp <0.05, significance). D) Distribution of the effect size of the principal component correlations. E) Distribution of the William’s T-statistic values compared to the frequency, to define the critical point of significance. F) William T-statistic values for the comparison across the principal component correlation coefficient values, significance indicated *, p<0.05.*

***
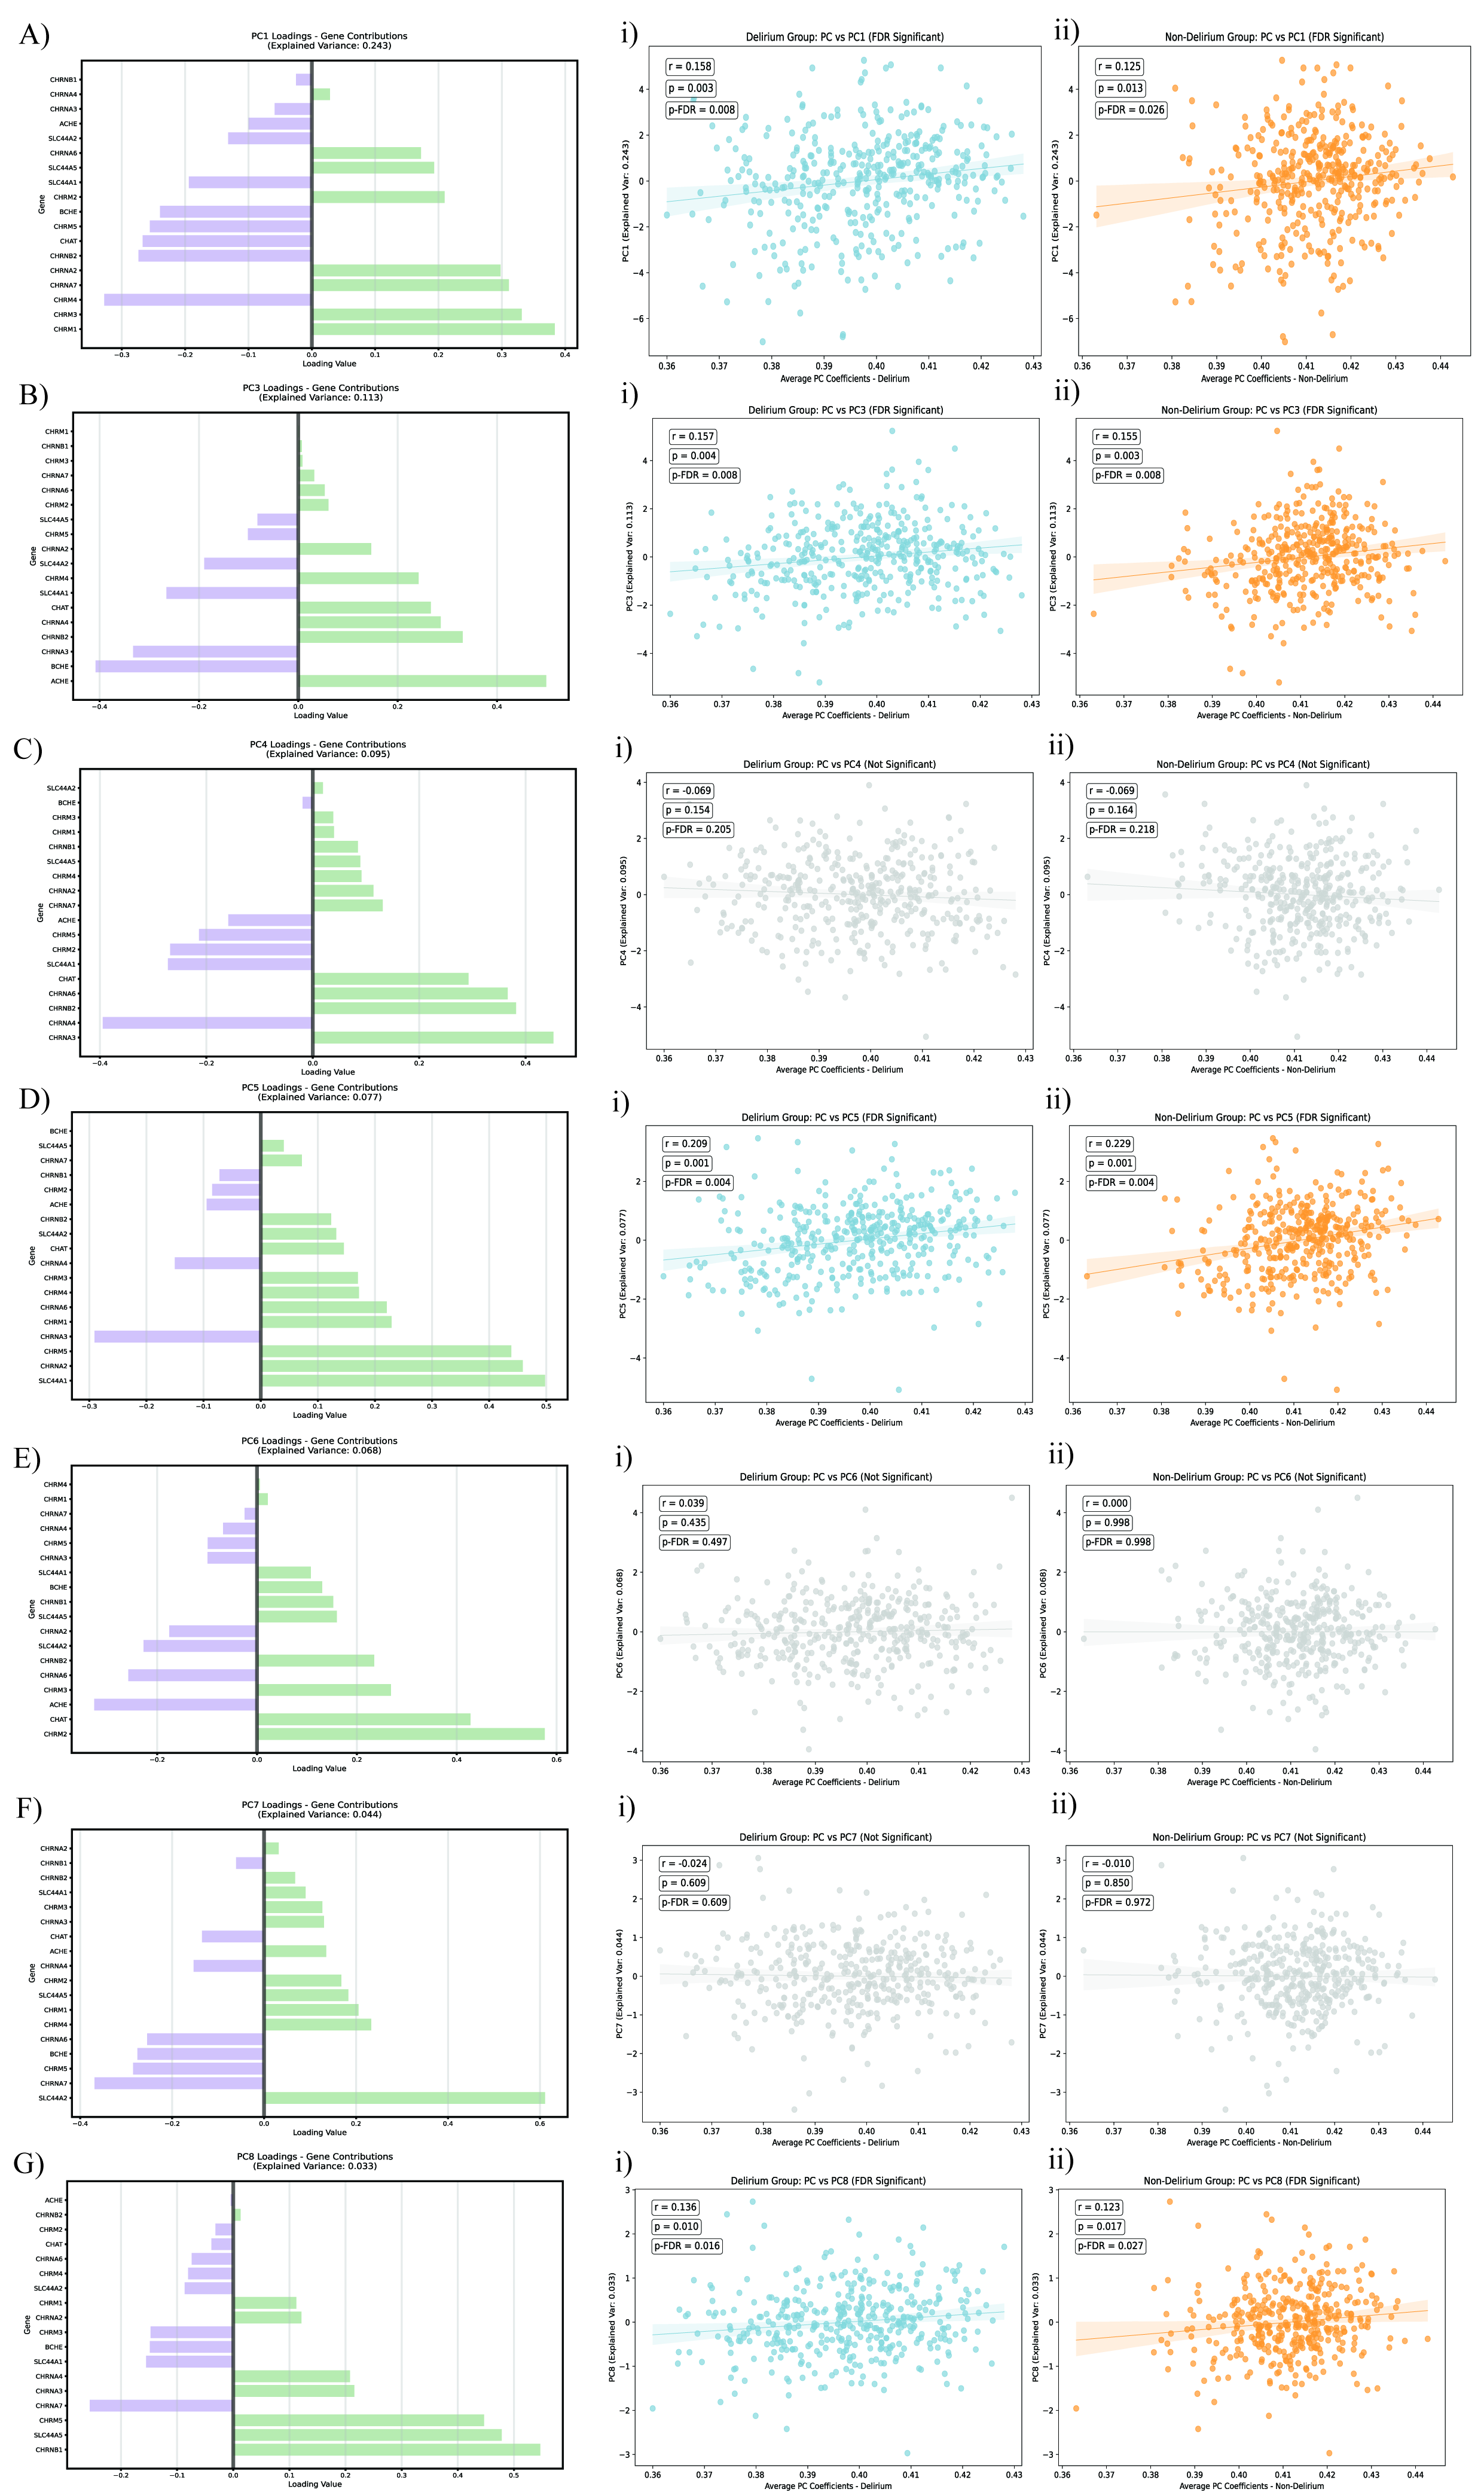
***

***Supplementary Figure 6: Relationship between principal components of Cholinergic Gene Expression and Segregated Network Topology.*** *A-G) The principal component coefficient loadings for the pre-selected cholinergic genes in the principal component (1-8, excluding 2nd component). i)the Pearson correlation between average participation coefficient for delirium participants compares compared to selected principal component of gene expression (pspin <0.05, FDR correction). ii) the Pearson correlation between average participation coefficient for non-delirious participants compared to selected principal component of gene expression (pspin <0.05, FDR correction).*

*
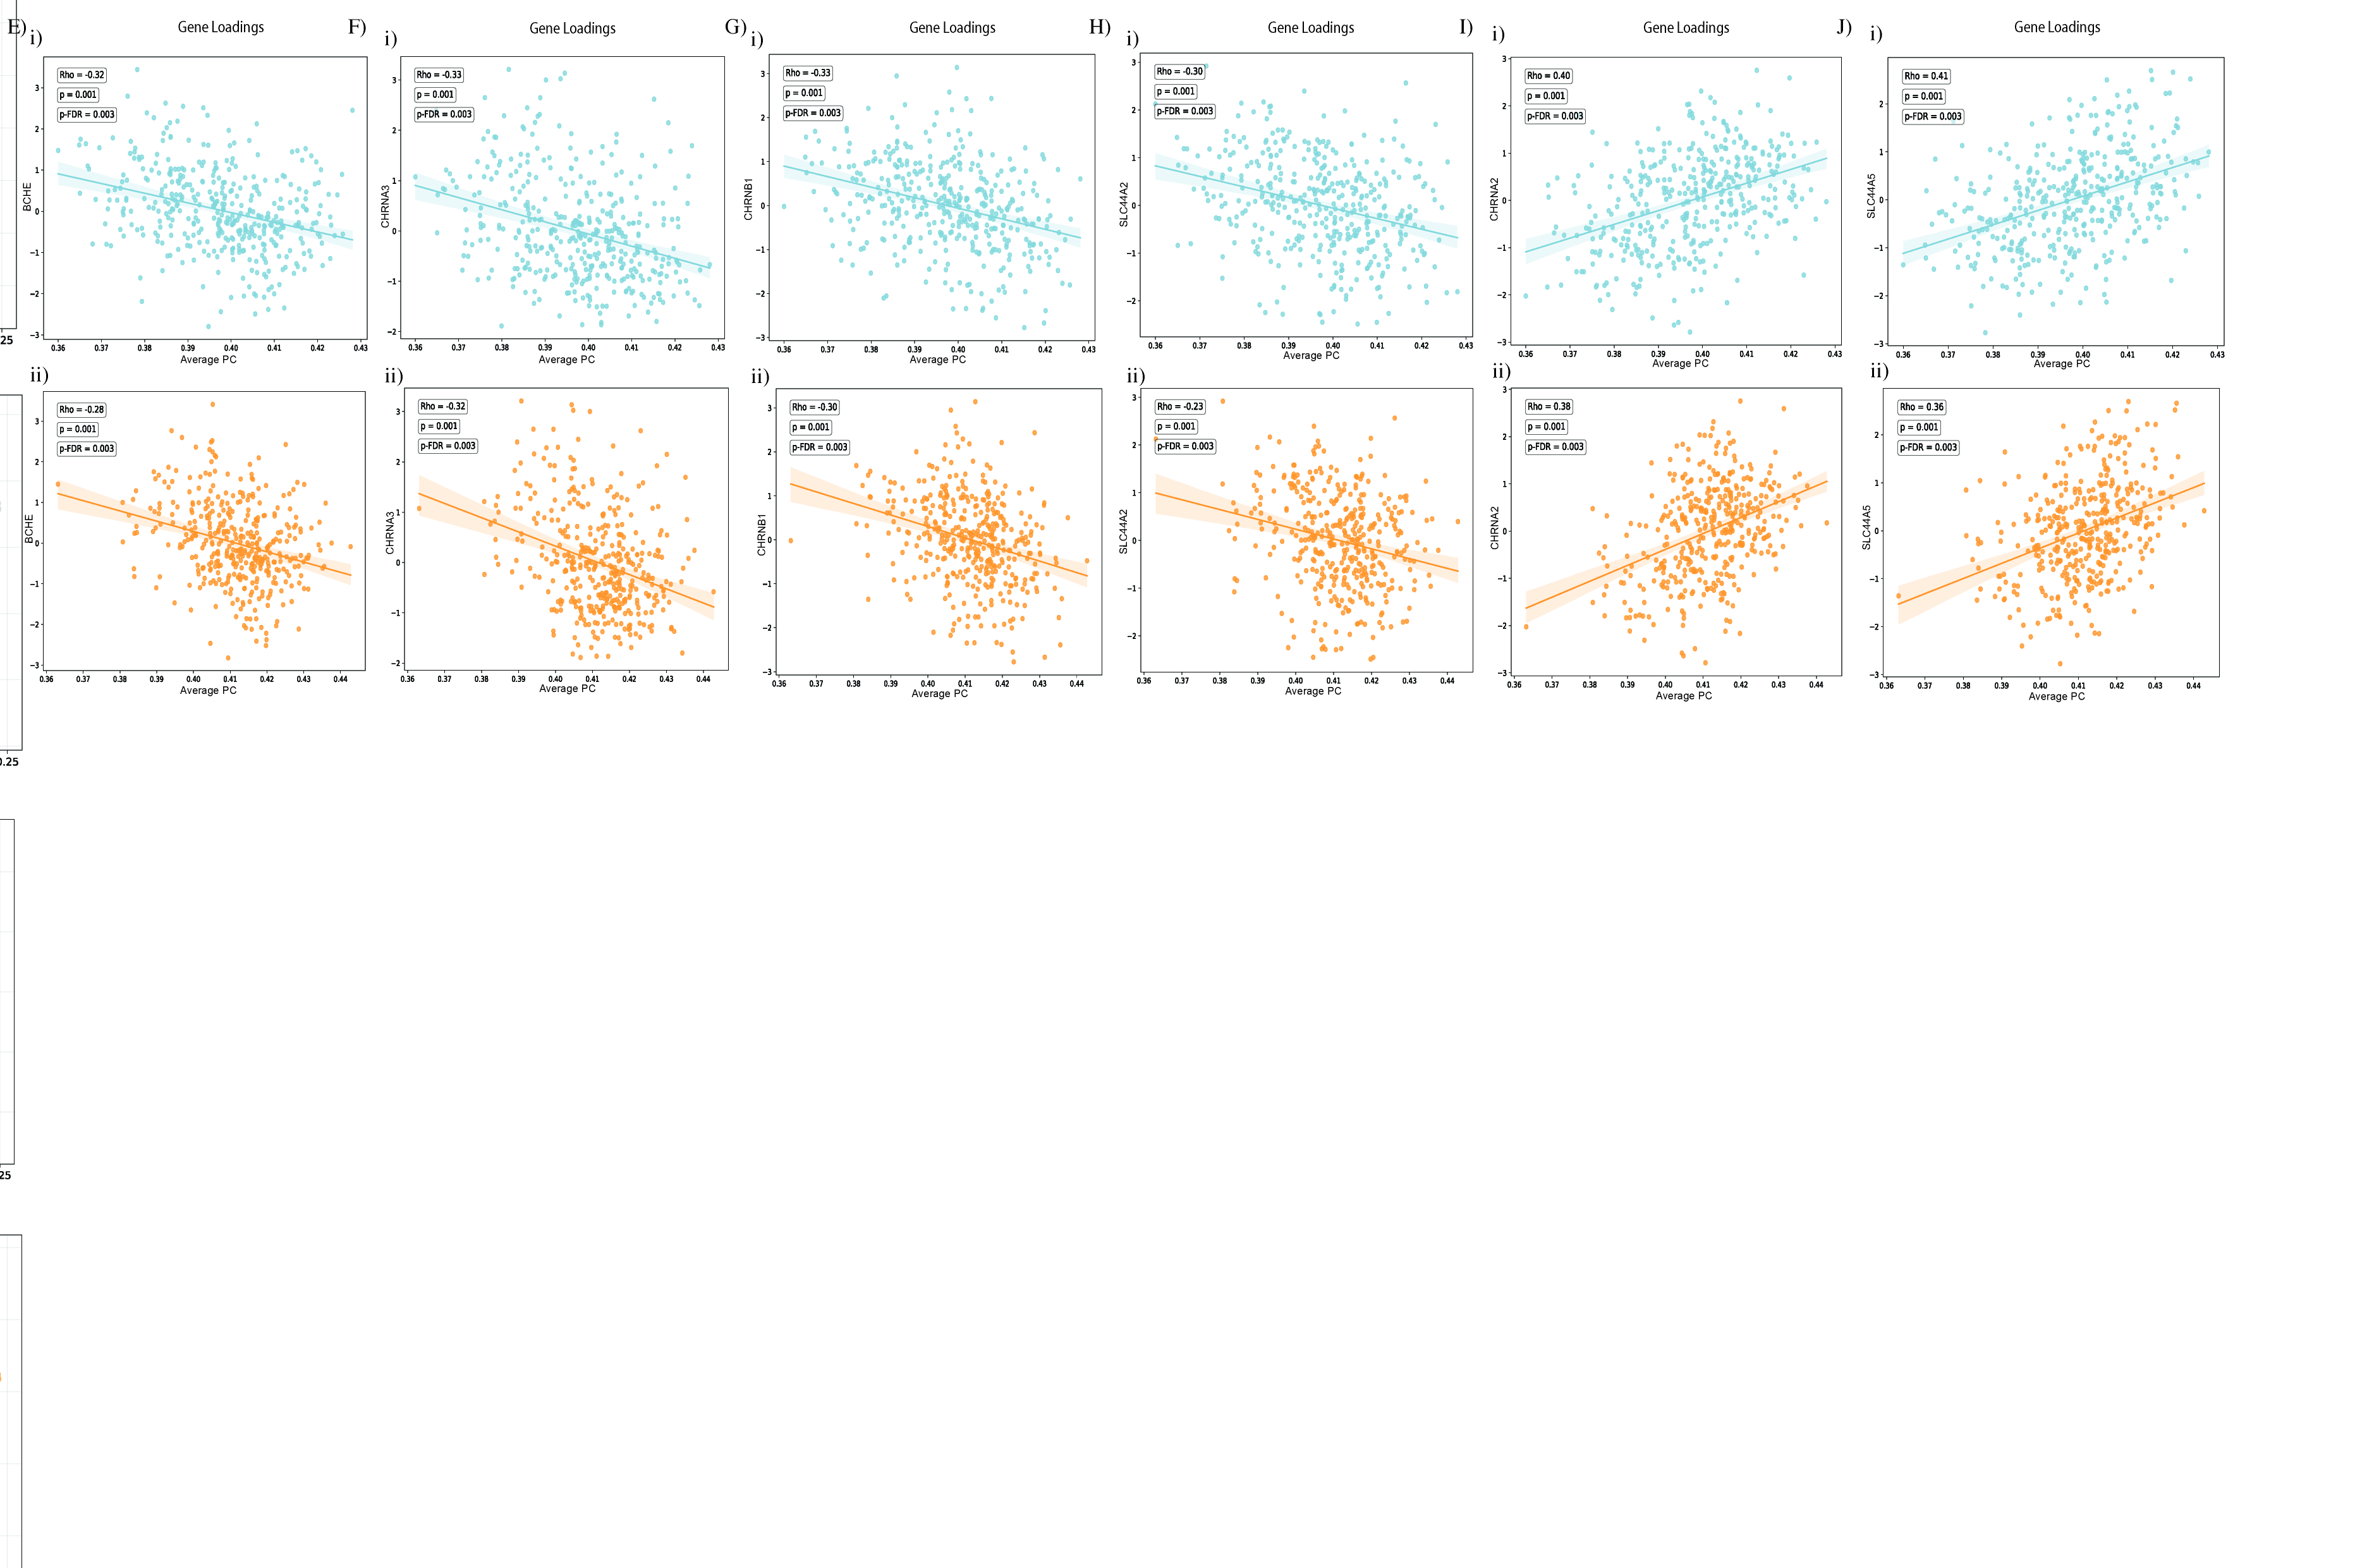
*

***Supplementary Figure S7: Relationship between selected gene expression from second principal component and Segregated Network Topology for delirium and non-delirious.*** *i) the Pearson correlation between average participation coefficient for delirium participants compares compared to selected (E-J) gene expression (pspin <0.05, FDR correction). ii) the Pearson correlation between average participation coefficient for non-delirious participants compared to selected (E-J) gene expression (pspin <0.05, FDR correction). E) BCHE = butyrylcholinesterase. F) CHRNA3 = nAChR 3 subunit. G) CHRNB1 = nAChR ß subunit. H) SLC44A2 = choline transporter-like protein 2. I) CHRNA2 = nAChR 2 subunit. J) SLC44A5 = choline transporter-like protein 5.*

***
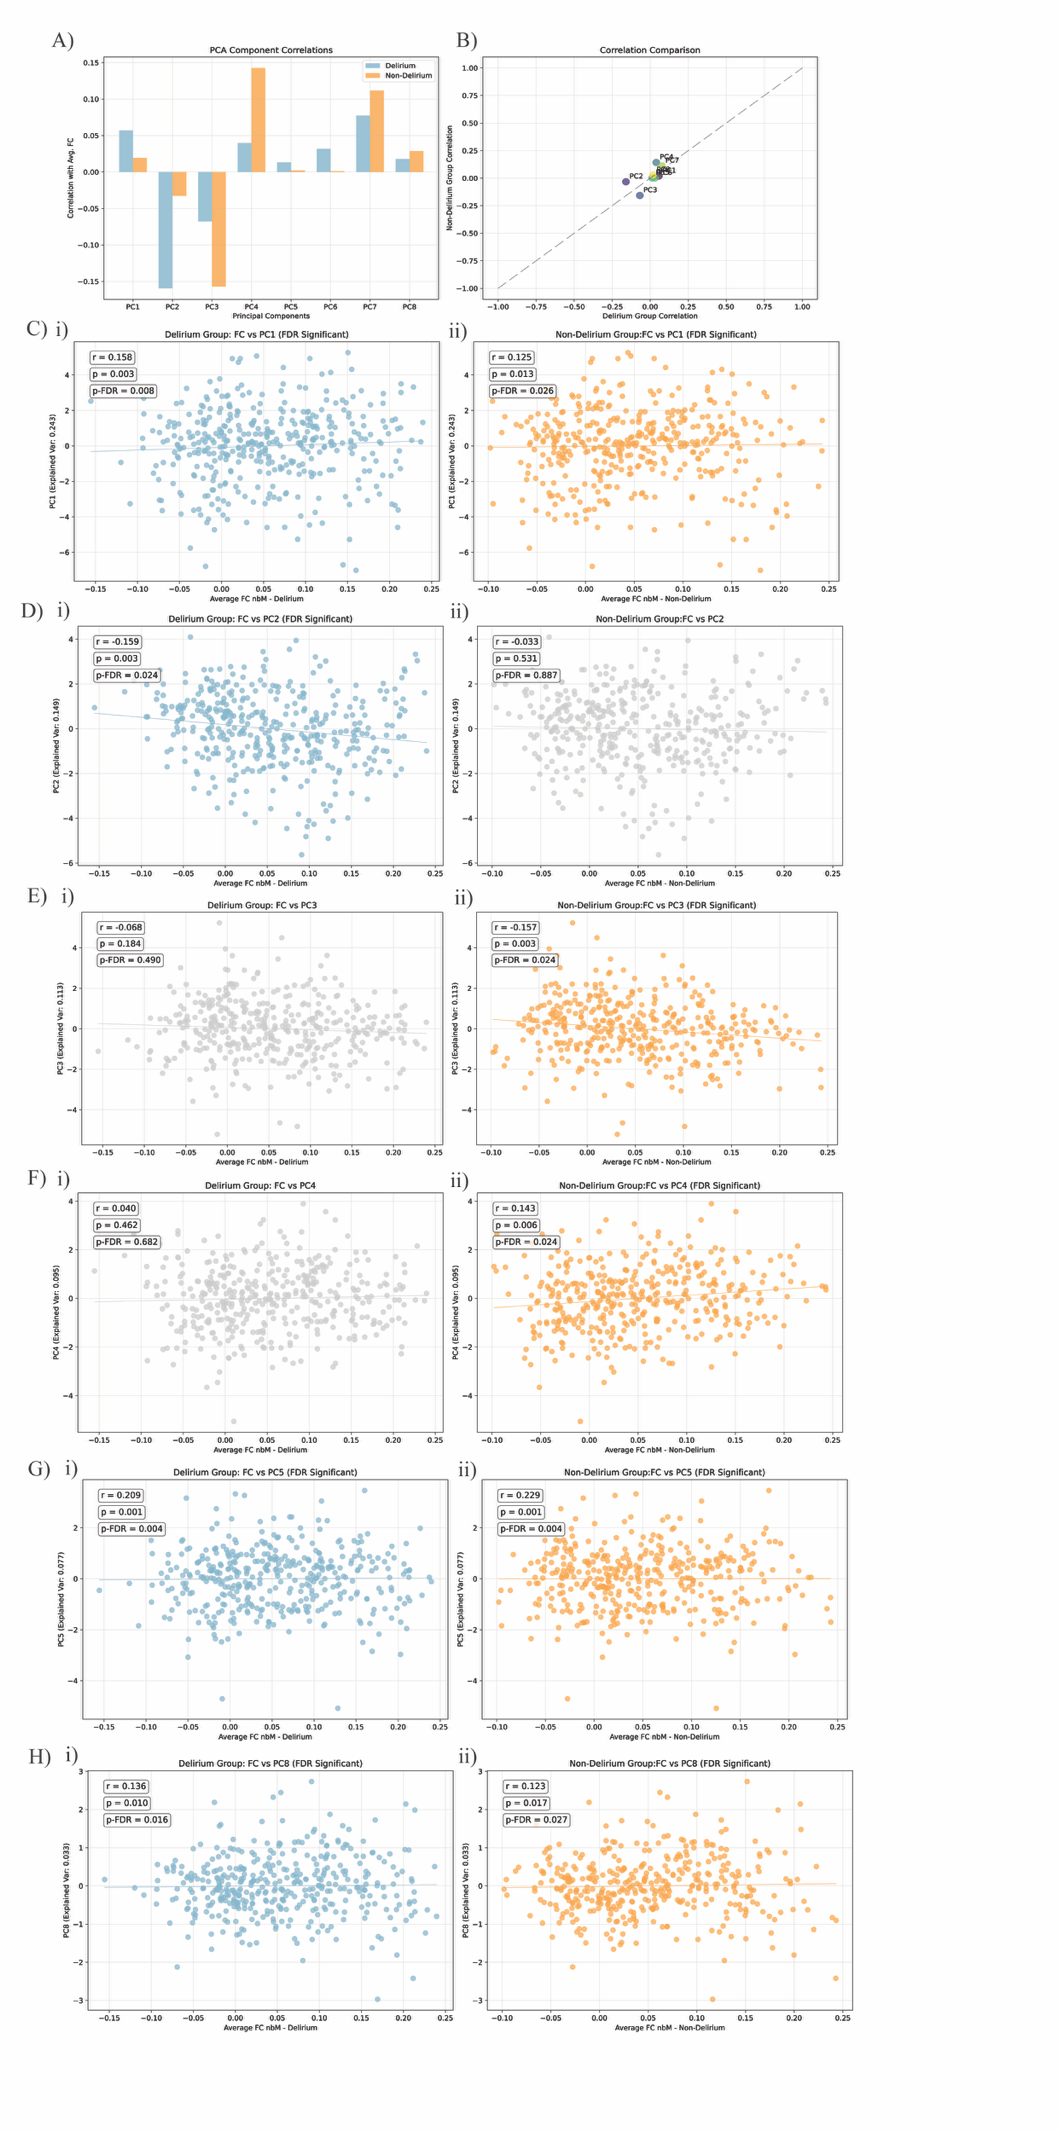
***

***Supplementary Figure 8: Relationship between principal components of Cholinergic Gene Expression and Average Functional Connectivity of nbM.*** *A) The principal component coefficient loadings map correlated with average nbM functional connectivity between delirium and non-delirious. B) Correlation map between the principal components versus the average functional connectivity of nbM of delirium compared to non-delirious. i)the Pearson correlation between average functional connectivity nbM for delirium participants compares compared 1-8 principal component of gene expression (pspin <0.05, FDR correction). ii) the Pearson correlation between average functional connectivity nbM for non-delirious participants compared to 1-8 principal component of gene expression (pspin <0.05, FDR correction).*

***
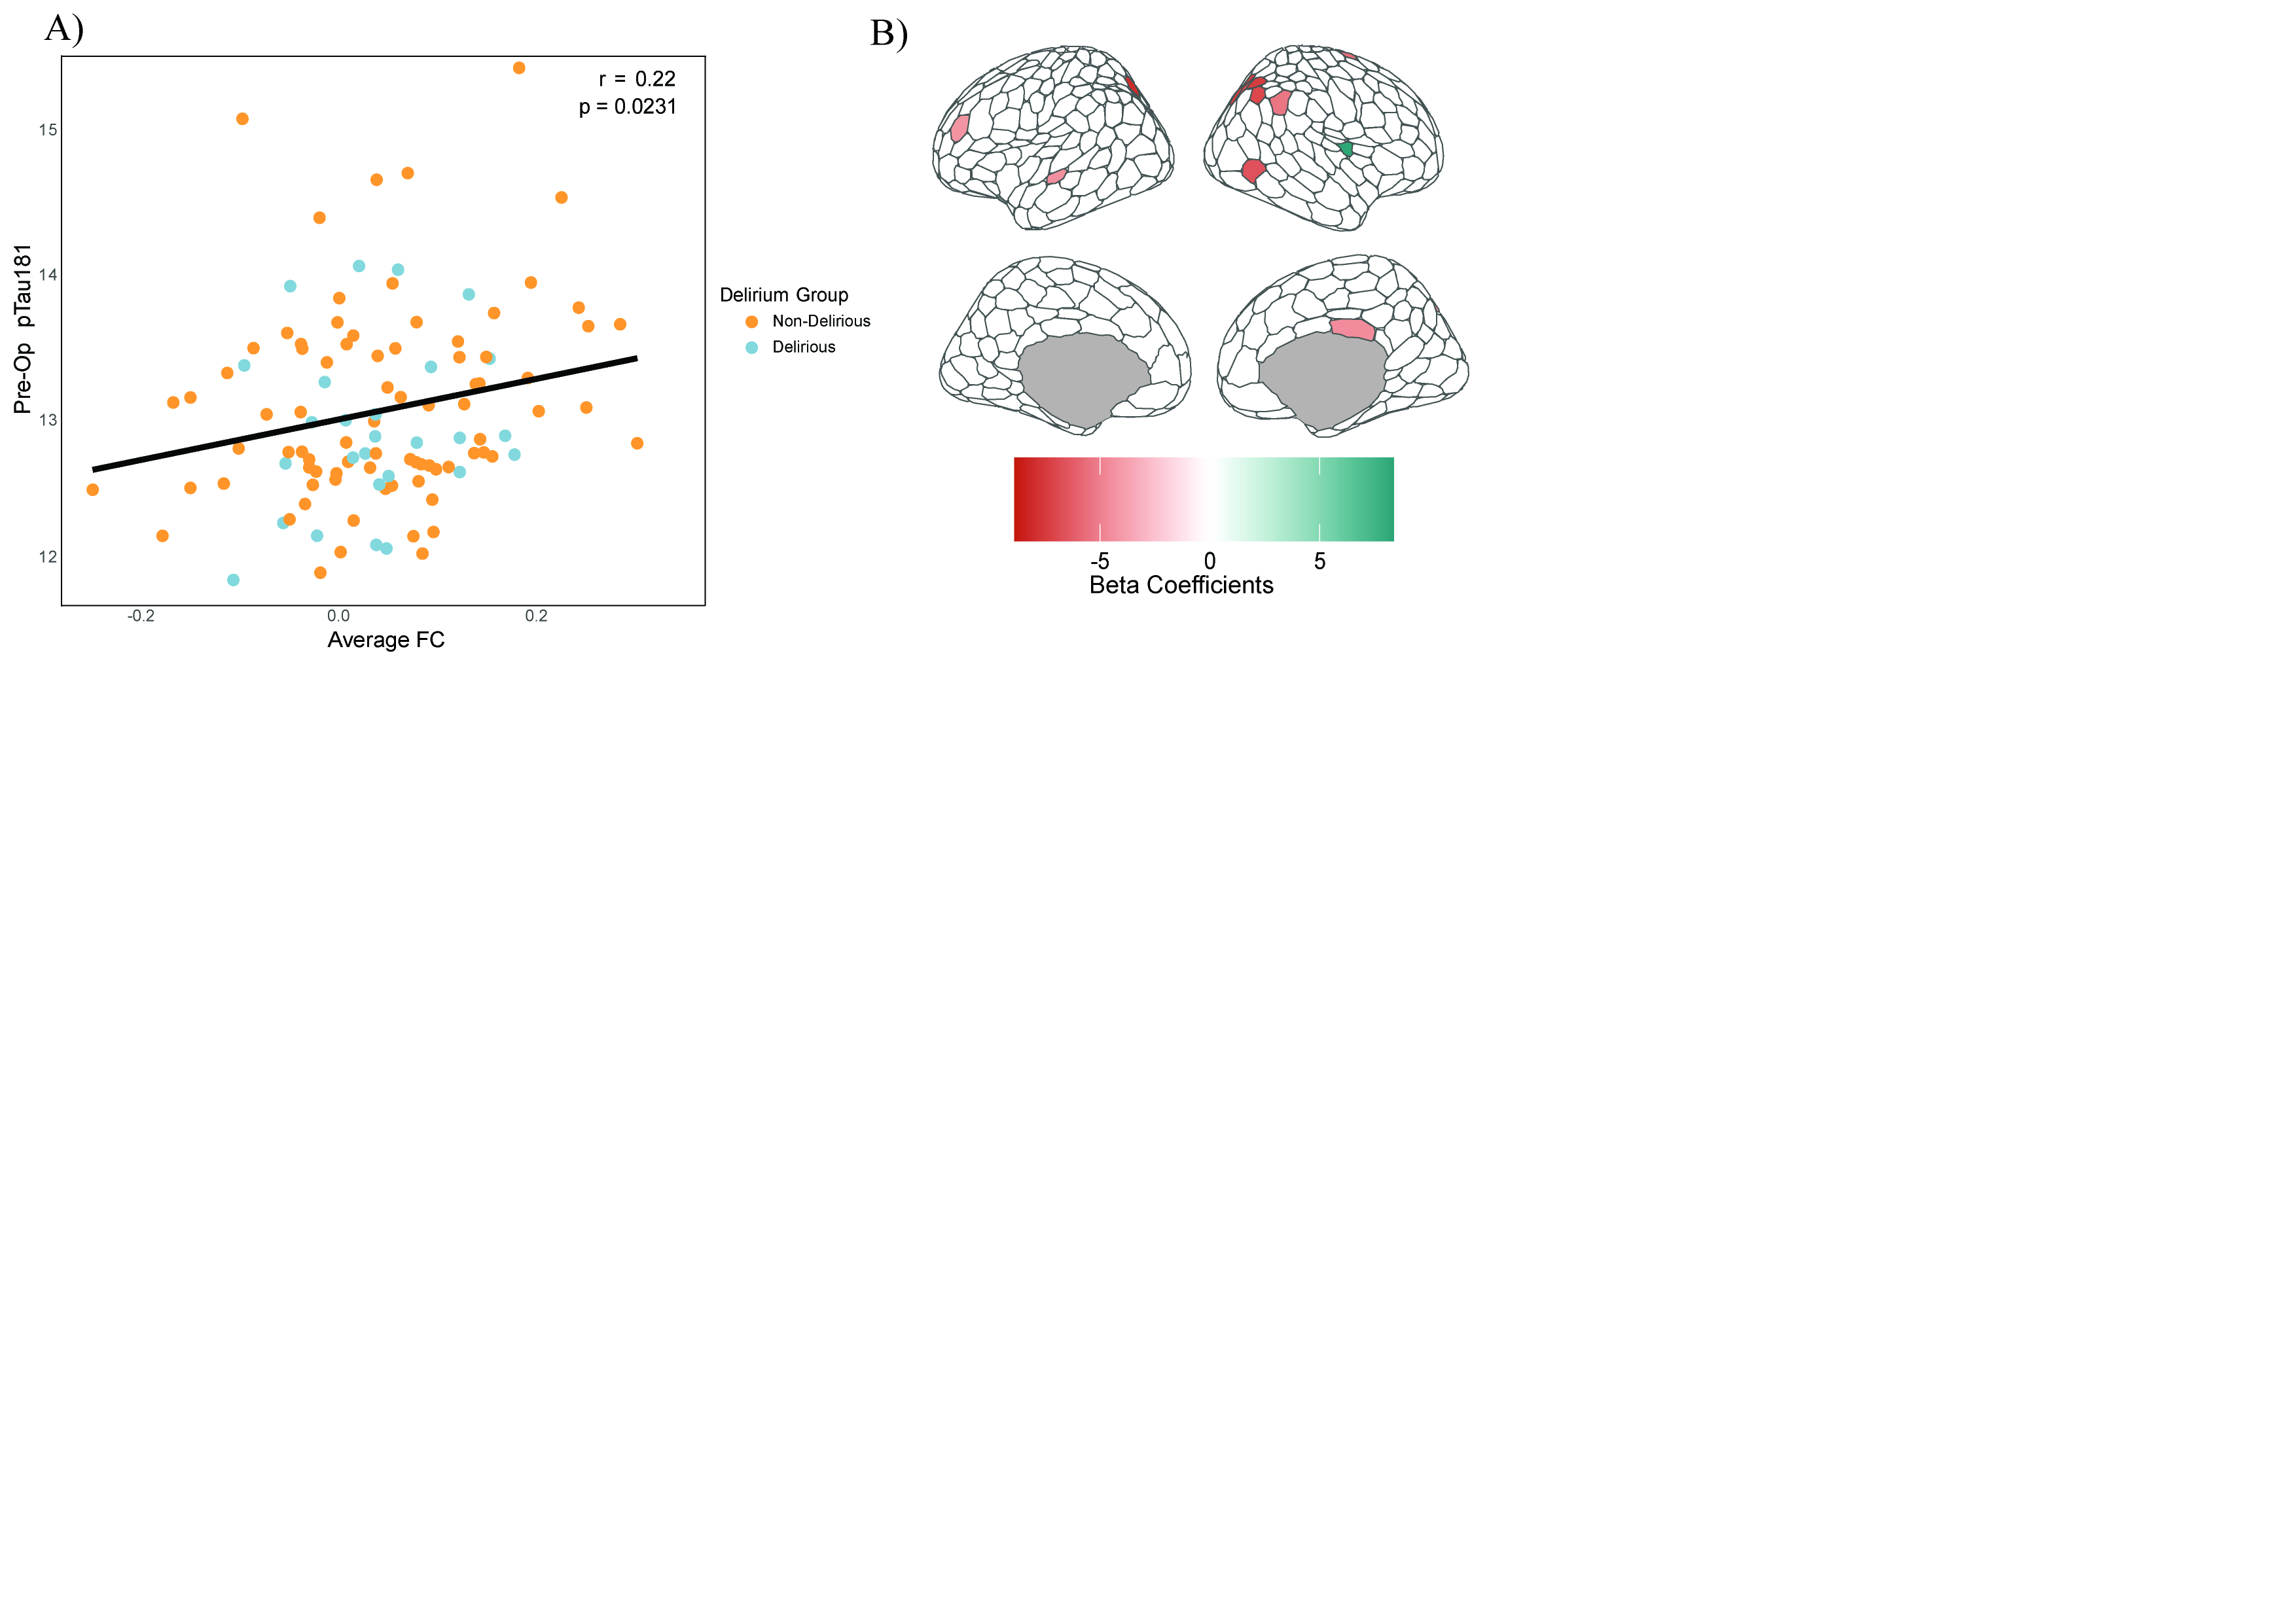
***

***Supplementary Figure S9: Significant relationship between average nbM Functional Connectivity compared to Blood Biomarker pTau181.*** *A) Correlation between preoperative pTau181 blood biomarker and average nbM functional connectivity (significance p<0.05, not FDR significant). B) Linear relationship between average nbM functional connectivity and pTau181 blood biomarker (with covariates of age and gender), Beta coefficients (significance p<0.05, not FDR significant).*
